# Supplementary material
Source: publisher figshare collection journal article supplement (https://acs.figshare.com/ndownloader/files/4658848)
Supplement: Supplementary file 1 [file 4658848]

data_publication_text
_publ_requested_journal          Angew.Chem.,Int.Ed.
_publ_contact_author_name        'Robert G. Bergman'
_publ_contact_author_email       rbergman@berkeley.edu
loop_
_publ_author_name
'Krinsky, Jamin L.' ''
'Anderson, Laura L.' ''
'Arnold, John' ''
'Bergman, Robert G.' ''

 
data_compound_2_synch 
 
_audit_creation_method            SHELXL-97 
_chemical_name_systematic 
; 
 ? 
; 
_chemical_name_common             ? 
_chemical_melting_point           ? 
_chemical_formula_moiety          'C84 H70 N14 O Ta6, 4(C6 H6)' 
_chemical_formula_sum 
 'C108 H94 N14 O Ta6' 
_chemical_formula_weight          2689.67 
 
loop_ 
 _atom_type_symbol 
 _atom_type_description 
 _atom_type_scat_dispersion_real 
 _atom_type_scat_dispersion_imag 
 _atom_type_scat_source 
 'C'  'C'  -0.0020   0.0020 
 'International Tables Vol C Tables 4.2.6.8 and 6.1.1.4' 
 'H'  'H'   0.0000   0.0000 
 'International Tables Vol C Tables 4.2.6.8 and 6.1.1.4' 
 'N'  'N'  -0.0031   0.0040 
 'International Tables Vol C Tables 4.2.6.8 and 6.1.1.4' 
 'O'  'O'  -0.0041   0.0074 
 'International Tables Vol C Tables 4.2.6.8 and 6.1.1.4' 
 'Ta'  'Ta'  -1.2701   7.5408 
 'International Tables Vol C Tables 4.2.6.8 and 6.1.1.4' 
 
_symmetry_cell_setting            Triclinic 
_symmetry_space_group_name_H-M    'P -1' 
 
loop_ 
 _symmetry_equiv_pos_as_xyz 
 'x, y, z' 
 '-x, -y, -z' 
 
_cell_length_a                    14.137(3) 
_cell_length_b                    14.262(3) 
_cell_length_c                    14.343(3) 
_cell_angle_alpha                 76.192(4) 
_cell_angle_beta                  72.097(4) 
_cell_angle_gamma                 60.491(4) 
_cell_volume                      2381.5(9) 
_cell_formula_units_Z             1 
_cell_measurement_temperature     193(2) 
_cell_measurement_reflns_used     8307 
_cell_measurement_theta_min       2.56 
_cell_measurement_theta_max       33.66
 
_exptl_crystal_description        block 
_exptl_crystal_colour             red 
_exptl_crystal_size_max           0.05 
_exptl_crystal_size_mid           0.05 
_exptl_crystal_size_min           0.04 
_exptl_crystal_density_meas       ? 
_exptl_crystal_density_diffrn     1.875 
_exptl_crystal_density_method     'not measured' 
_exptl_crystal_F_000              1286 
_exptl_absorpt_coefficient_mu     8.586 
_exptl_absorpt_correction_type    'empirical' 
_exptl_absorpt_correction_T_min   0.6734 
_exptl_absorpt_correction_T_max   0.7252 
_exptl_absorpt_process_details    'Blessing, 1995' 
 
_exptl_special_details 
; 
 ? 
; 
 
_diffrn_ambient_temperature       193(2) 
_diffrn_radiation_wavelength      0.77490 
_diffrn_radiation_type            synchrotron 
_diffrn_radiation_source          synchrotron
_diffrn_radiation_monochromator   'Si-<111> channel-cut crystal' 
_diffrn_measurement_device_type   'Bruker Platinum 200' 
_diffrn_measurement_method        \w/2\q-scans 
_diffrn_detector_area_resol_mean  36.23
_diffrn_standards_number          0 
_diffrn_standards_interval_count  0 
_diffrn_standards_interval_time   0 
_diffrn_standards_decay_%         0 
_diffrn_reflns_number             32552 
_diffrn_reflns_av_R_equivalents   0.0600 
_diffrn_reflns_av_sigmaI/netI     0.0689 
_diffrn_reflns_limit_h_min        -20 
_diffrn_reflns_limit_h_max        20 
_diffrn_reflns_limit_k_min        -20 
_diffrn_reflns_limit_k_max        20 
_diffrn_reflns_limit_l_min        -20 
_diffrn_reflns_limit_l_max        20 
_diffrn_reflns_theta_min          1.80 
_diffrn_reflns_theta_max          33.67 
_reflns_number_total              13506 
_reflns_number_gt                 12494 
_reflns_threshold_expression      >2sigma(I) 
 
_computing_data_collection        'Bruker Apex2-v2.02' 
_computing_cell_refinement        'Bruker SAINT-v7.23'
_computing_data_reduction         'Bruker SAINT-v7.23'
_computing_structure_solution     'SHELXS-97 (Sheldrick, 1990)' 
_computing_structure_refinement   'SHELXL-97 (Sheldrick, 1997)' 
_computing_molecular_graphics     'Bruker SHELXTL-XP' 
_computing_publication_material   ? 
 
_refine_special_details 
; 
 Refinement of F^2^ against ALL reflections.  The weighted R-factor wR and 
 goodness of fit S are based on F^2^, conventional R-factors R are based 
 on F, with F set to zero for negative F^2^. The threshold expression of 
 F^2^ > 2sigma(F^2^) is used only for calculating R-factors(gt) etc. and is 
 not relevant to the choice of reflections for refinement.  R-factors based 
 on F^2^ are statistically about twice as large as those based on F, and R- 
 factors based on ALL data will be even larger. 
; 
 
_refine_ls_structure_factor_coef  Fsqd  
_refine_ls_matrix_type            full 
_refine_ls_weighting_scheme       calc  
_refine_ls_weighting_details 
 'calc w=1/[\s^2^(Fo^2^)+(0.0984P)^2^+0.0000P] where P=(Fo^2^+2Fc^2^)/3' 
_atom_sites_solution_primary      direct 
_atom_sites_solution_secondary    difmap 
_atom_sites_solution_hydrogens    geom 
_refine_ls_hydrogen_treatment     constr 
_refine_ls_extinction_method      none 
_refine_ls_extinction_coef        ? 
_refine_ls_number_reflns          13506 
_refine_ls_number_parameters      583 
_refine_ls_number_restraints      0 
_refine_ls_R_factor_all           0.0520 
_refine_ls_R_factor_gt            0.0501 
_refine_ls_wR_factor_ref          0.1384 
_refine_ls_wR_factor_gt           0.1359 
_refine_ls_goodness_of_fit_ref    1.026 
_refine_ls_restrained_S_all       1.026 
_refine_ls_shift/su_max           0.002 
_refine_ls_shift/su_mean          0.000 
 
loop_ 
 _atom_site_label 
 _atom_site_type_symbol 
 _atom_site_fract_x 
 _atom_site_fract_y 
 _atom_site_fract_z 
 _atom_site_U_iso_or_equiv 
 _atom_site_adp_type 
 _atom_site_occupancy 
 _atom_site_symmetry_multiplicity 
 _atom_site_calc_flag 
 _atom_site_refinement_flags 
 _atom_site_disorder_assembly 
 _atom_site_disorder_group 
Ta1 Ta 0.596190(15) 0.415001(14) 0.615685(12) 0.02105(6) Uani 1 1 d . . . 
Ta2 Ta 0.414127(15) 0.650649(14) 0.571401(12) 0.02110(6) Uani 1 1 d . . . 
Ta3 Ta 0.368472(15) 0.452916(14) 0.588571(12) 0.02093(6) Uani 1 1 d . . . 
N1 N 0.4220(3) 0.5112(3) 0.6810(2) 0.0246(7) Uani 1 1 d . . . 
N2 N 0.5959(3) 0.5685(3) 0.5670(3) 0.0241(7) Uani 1 1 d . . . 
N3 N 0.6804(3) 0.3357(3) 0.7037(3) 0.0259(7) Uani 1 1 d . . . 
N4 N 0.3492(3) 0.7745(3) 0.6267(3) 0.0252(7) Uani 1 1 d . . . 
N5 N 0.4696(3) 0.6848(3) 0.4152(2) 0.0228(7) Uani 1 1 d . . . 
N6 N 0.2937(3) 0.6260(3) 0.5315(3) 0.0252(7) Uani 1 1 d . . . 
N7 N 0.2607(3) 0.4152(3) 0.6567(3) 0.0264(7) Uani 1 1 d . . . 
O1 O 0.5000 0.5000 0.5000 0.0191(7) Uani 1 2 d S . . 
C11 C 0.3722(4) 0.5364(4) 0.7818(3) 0.0286(9) Uani 1 1 d . . . 
C12 C 0.4311(5) 0.5505(4) 0.8342(4) 0.0367(11) Uani 1 1 d . . . 
H12A H 0.5048 0.5413 0.8048 0.044 Uiso 1 1 calc R . . 
C13 C 0.3819(6) 0.5781(5) 0.9300(4) 0.0477(13) Uani 1 1 d . . . 
H13A H 0.4213 0.5898 0.9654 0.057 Uiso 1 1 calc R . . 
C14 C 0.2768(7) 0.5885(7) 0.9739(5) 0.0589(18) Uani 1 1 d . . . 
H14A H 0.2444 0.6053 1.0401 0.071 Uiso 1 1 calc R . . 
C15 C 0.2187(6) 0.5747(6) 0.9220(5) 0.0563(16) Uani 1 1 d . . . 
H15A H 0.1455 0.5829 0.9523 0.068 Uiso 1 1 calc R . . 
C16 C 0.2654(5) 0.5489(5) 0.8255(4) 0.0440(12) Uani 1 1 d . . . 
H16A H 0.2243 0.5399 0.7899 0.053 Uiso 1 1 calc R . . 
C21 C 0.6461(4) 0.6193(4) 0.5997(4) 0.0288(9) Uani 1 1 d . . . 
C22 C 0.7252(4) 0.5576(4) 0.6577(4) 0.0351(11) Uani 1 1 d . . . 
H22A H 0.7469 0.4824 0.6754 0.042 Uiso 1 1 calc R . . 
C23 C 0.7716(5) 0.6077(4) 0.6890(5) 0.0439(13) Uani 1 1 d . . . 
H23A H 0.8259 0.5658 0.7275 0.053 Uiso 1 1 calc R . . 
C24 C 0.7404(5) 0.7167(4) 0.6654(4) 0.0392(11) Uani 1 1 d . . . 
H24A H 0.7716 0.7503 0.6883 0.047 Uiso 1 1 calc R . . 
C25 C 0.6629(5) 0.7767(4) 0.6076(4) 0.0383(11) Uani 1 1 d . . . 
H25A H 0.6412 0.8520 0.5905 0.046 Uiso 1 1 calc R . . 
C26 C 0.6162(4) 0.7288(4) 0.5741(4) 0.0330(10) Uani 1 1 d . . . 
H26A H 0.5639 0.7709 0.5337 0.040 Uiso 1 1 calc R . . 
C31 C 0.7534(4) 0.2629(4) 0.7635(3) 0.0302(10) Uani 1 1 d . . . 
C32 C 0.8621(5) 0.1922(5) 0.7203(5) 0.0456(14) Uani 1 1 d . . . 
H32A H 0.8869 0.1955 0.6507 0.055 Uiso 1 1 calc R . . 
C33 C 0.9343(5) 0.1168(5) 0.7801(5) 0.0524(16) Uani 1 1 d . . . 
H33A H 1.0085 0.0691 0.7509 0.063 Uiso 1 1 calc R . . 
C34 C 0.8989(6) 0.1113(6) 0.8804(5) 0.0579(19) Uani 1 1 d . . . 
H34A H 0.9488 0.0608 0.9208 0.069 Uiso 1 1 calc R . . 
C35 C 0.7924(7) 0.1780(6) 0.9220(5) 0.0597(19) Uani 1 1 d . . . 
H35A H 0.7680 0.1716 0.9918 0.072 Uiso 1 1 calc R . . 
C36 C 0.7177(6) 0.2558(5) 0.8659(4) 0.0439(13) Uani 1 1 d . . . 
H36A H 0.6439 0.3030 0.8966 0.053 Uiso 1 1 calc R . . 
C41 C 0.3051(4) 0.8712(4) 0.6656(4) 0.0303(9) Uani 1 1 d . . . 
C42 C 0.3054(5) 0.9630(4) 0.6037(4) 0.0442(12) Uani 1 1 d . . . 
H42A H 0.3333 0.9599 0.5346 0.053 Uiso 1 1 calc R . . 
C43 C 0.2642(6) 1.0591(4) 0.6443(5) 0.0523(15) Uani 1 1 d . . . 
H43A H 0.2623 1.1223 0.6022 0.063 Uiso 1 1 calc R . . 
C44 C 0.2268(5) 1.0637(5) 0.7435(5) 0.0492(15) Uani 1 1 d . . . 
H44A H 0.2017 1.1287 0.7708 0.059 Uiso 1 1 calc R . . 
C45 C 0.2256(6) 0.9732(5) 0.8037(5) 0.0555(17) Uani 1 1 d . . . 
H45A H 0.1973 0.9770 0.8727 0.067 Uiso 1 1 calc R . . 
C46 C 0.2646(5) 0.8775(4) 0.7663(4) 0.0417(12) Uani 1 1 d . . . 
H46A H 0.2638 0.8157 0.8092 0.050 Uiso 1 1 calc R . . 
C51 C 0.4399(4) 0.7959(4) 0.3697(3) 0.0290(9) Uani 1 1 d . . . 
C52 C 0.5198(4) 0.8332(4) 0.3387(4) 0.0324(10) Uani 1 1 d . . . 
H52A H 0.5934 0.7875 0.3481 0.039 Uiso 1 1 calc R . . 
C53 C 0.4899(5) 0.9400(4) 0.2930(4) 0.0400(12) Uani 1 1 d . . . 
H53A H 0.5429 0.9675 0.2740 0.048 Uiso 1 1 calc R . . 
C54 C 0.3845(5) 1.0048(4) 0.2756(4) 0.0399(12) Uani 1 1 d . . . 
H54A H 0.3660 1.0754 0.2419 0.048 Uiso 1 1 calc R . . 
C55 C 0.3057(5) 0.9667(4) 0.3075(4) 0.0374(11) Uani 1 1 d . . . 
H55A H 0.2324 1.0121 0.2971 0.045 Uiso 1 1 calc R . . 
C56 C 0.3330(4) 0.8618(4) 0.3550(4) 0.0313(9) Uani 1 1 d . . . 
H56A H 0.2785 0.8360 0.3771 0.038 Uiso 1 1 calc R . . 
C61 C 0.1762(4) 0.6936(4) 0.5381(4) 0.0290(9) Uani 1 1 d . . . 
C62 C 0.1257(4) 0.8005(4) 0.5562(4) 0.0358(10) Uani 1 1 d . . . 
H62A H 0.1686 0.8305 0.5658 0.043 Uiso 1 1 calc R . . 
C63 C 0.0112(5) 0.8650(4) 0.5606(5) 0.0438(12) Uani 1 1 d . . . 
H63A H -0.0230 0.9386 0.5727 0.053 Uiso 1 1 calc R . . 
C64 C -0.0525(5) 0.8224(5) 0.5473(5) 0.0445(13) Uani 1 1 d . . . 
H64A H -0.1298 0.8663 0.5495 0.053 Uiso 1 1 calc R . . 
C65 C -0.0014(5) 0.7148(5) 0.5308(5) 0.0440(13) Uani 1 1 d . . . 
H65A H -0.0449 0.6847 0.5227 0.053 Uiso 1 1 calc R . . 
C66 C 0.1118(4) 0.6495(4) 0.5257(4) 0.0328(10) Uani 1 1 d . . . 
H66A H 0.1454 0.5758 0.5140 0.039 Uiso 1 1 calc R . . 
C71 C 0.1755(4) 0.3864(4) 0.7072(4) 0.0310(9) Uani 1 1 d . . . 
C72 C 0.1537(6) 0.3634(5) 0.8087(4) 0.0470(14) Uani 1 1 d . . . 
H72A H 0.1985 0.3652 0.8452 0.056 Uiso 1 1 calc R . . 
C73 C 0.0667(6) 0.3376(6) 0.8574(5) 0.0573(17) Uani 1 1 d . . . 
H73A H 0.0515 0.3228 0.9271 0.069 Uiso 1 1 calc R . . 
C74 C 0.0027(6) 0.3335(5) 0.8049(6) 0.0597(19) Uani 1 1 d . . . 
H74A H -0.0573 0.3168 0.8385 0.072 Uiso 1 1 calc R . . 
C75 C 0.0249(5) 0.3532(5) 0.7045(6) 0.0545(17) Uani 1 1 d . . . 
H75A H -0.0187 0.3481 0.6688 0.065 Uiso 1 1 calc R . . 
C76 C 0.1104(5) 0.3807(4) 0.6540(5) 0.0422(12) Uani 1 1 d . . . 
H76A H 0.1247 0.3954 0.5842 0.051 Uiso 1 1 calc R . . 
C81 C 0.4468(8) 0.2801(7) 1.0636(7) 0.071(2) Uani 1 1 d . . . 
H81A H 0.4098 0.3418 1.0990 0.085 Uiso 1 1 calc R . . 
C82 C 0.5132(7) 0.1778(7) 1.1070(5) 0.065(2) Uani 1 1 d . . . 
H82A H 0.5210 0.1703 1.1721 0.078 Uiso 1 1 calc R . . 
C83 C 0.5658(8) 0.0901(7) 1.0568(6) 0.068(2) Uani 1 1 d . . . 
H83A H 0.6120 0.0212 1.0856 0.082 Uiso 1 1 calc R . . 
C84 C 0.5512(8) 0.1024(7) 0.9613(6) 0.073(2) Uani 1 1 d . . . 
H84A H 0.5860 0.0411 0.9258 0.087 Uiso 1 1 calc R . . 
C85 C 0.4878(9) 0.2012(8) 0.9197(6) 0.075(2) Uani 1 1 d . . . 
H85A H 0.4792 0.2092 0.8547 0.089 Uiso 1 1 calc R . . 
C86 C 0.4362(9) 0.2894(7) 0.9707(7) 0.076(2) Uani 1 1 d . . . 
H86A H 0.3922 0.3585 0.9407 0.092 Uiso 1 1 calc R . . 
C91 C 0.8371(10) 0.6991(9) 0.9011(10) 0.096(3) Uani 1 1 d . . . 
H91A H 0.8007 0.6543 0.9264 0.115 Uiso 1 1 calc R . . 
C92 C 0.7881(9) 0.7992(9) 0.9346(9) 0.092(3) Uani 1 1 d . . . 
H92A H 0.7170 0.8245 0.9788 0.111 Uiso 1 1 calc R . . 
C93 C 0.8427(10) 0.8624(8) 0.9037(8) 0.085(3) Uani 1 1 d . . . 
H93A H 0.8119 0.9292 0.9301 0.102 Uiso 1 1 calc R . . 
C94 C 0.9401(9) 0.8296(9) 0.8359(9) 0.097(4) Uani 1 1 d . . . 
H94A H 0.9783 0.8728 0.8121 0.116 Uiso 1 1 calc R . . 
C95 C 0.9816(9) 0.7303(10) 0.8027(7) 0.102(4) Uani 1 1 d . . . 
H95A H 1.0492 0.7073 0.7537 0.122 Uiso 1 1 calc R . . 
C96 C 0.9328(11) 0.6629(9) 0.8351(9) 0.095(3) Uani 1 1 d . . . 
H96A H 0.9654 0.5942 0.8117 0.114 Uiso 1 1 calc R . . 
 
loop_ 
 _atom_site_aniso_label 
 _atom_site_aniso_U_11 
 _atom_site_aniso_U_22 
 _atom_site_aniso_U_33 
 _atom_site_aniso_U_23 
 _atom_site_aniso_U_13 
 _atom_site_aniso_U_12 
Ta1 0.02141(11) 0.01887(10) 0.02293(9) -0.00044(7) -0.00762(8) -0.00843(8) 
Ta2 0.02164(11) 0.01763(10) 0.02350(10) -0.00245(7) -0.00565(8) -0.00807(8) 
Ta3 0.02053(11) 0.01912(10) 0.02329(9) -0.00115(7) -0.00505(7) -0.00950(8) 
N1 0.0273(19) 0.0228(16) 0.0235(14) -0.0012(13) -0.0065(14) -0.0113(15) 
N2 0.0243(19) 0.0233(16) 0.0263(15) -0.0025(13) -0.0071(14) -0.0111(15) 
N3 0.027(2) 0.0248(17) 0.0271(15) -0.0010(13) -0.0096(15) -0.0115(15) 
N4 0.0250(19) 0.0199(16) 0.0288(15) -0.0050(13) -0.0060(14) -0.0078(14) 
N5 0.0251(18) 0.0195(15) 0.0241(14) 0.0009(12) -0.0077(13) -0.0104(14) 
N6 0.0211(18) 0.0240(16) 0.0282(15) -0.0027(13) -0.0056(14) -0.0085(15) 
N7 0.0243(19) 0.0253(17) 0.0291(16) -0.0024(14) -0.0039(14) -0.0125(15) 
O1 0.0171(19) 0.0177(17) 0.0216(16) -0.0019(13) -0.0058(14) -0.0065(15) 
C11 0.031(3) 0.027(2) 0.0253(18) -0.0060(16) -0.0034(17) -0.0121(19) 
C12 0.043(3) 0.041(3) 0.030(2) -0.0106(19) -0.009(2) -0.019(2) 
C13 0.052(4) 0.060(4) 0.038(3) -0.019(2) -0.006(3) -0.026(3) 
C14 0.068(5) 0.086(5) 0.033(2) -0.022(3) 0.007(3) -0.047(4) 
C15 0.048(4) 0.078(5) 0.044(3) -0.024(3) 0.014(3) -0.035(4) 
C16 0.031(3) 0.061(4) 0.042(3) -0.020(3) 0.001(2) -0.021(3) 
C21 0.028(2) 0.030(2) 0.031(2) -0.0080(18) -0.0070(18) -0.013(2) 
C22 0.034(3) 0.028(2) 0.050(3) -0.0051(19) -0.022(2) -0.011(2) 
C23 0.043(3) 0.038(3) 0.064(3) -0.007(2) -0.031(3) -0.017(2) 
C24 0.040(3) 0.042(3) 0.050(3) -0.014(2) -0.012(2) -0.024(2) 
C25 0.047(3) 0.033(2) 0.045(3) -0.004(2) -0.014(2) -0.024(2) 
C26 0.037(3) 0.028(2) 0.036(2) 0.0004(18) -0.012(2) -0.016(2) 
C31 0.038(3) 0.030(2) 0.0321(19) 0.0057(17) -0.0178(19) -0.020(2) 
C32 0.038(3) 0.046(3) 0.052(3) 0.010(3) -0.021(3) -0.019(3) 
C33 0.033(3) 0.047(3) 0.064(4) 0.009(3) -0.022(3) -0.010(3) 
C34 0.064(5) 0.052(4) 0.061(4) 0.023(3) -0.043(4) -0.025(3) 
C35 0.076(5) 0.058(4) 0.048(3) 0.018(3) -0.036(4) -0.029(4) 
C36 0.054(4) 0.040(3) 0.032(2) 0.000(2) -0.015(2) -0.016(3) 
C41 0.029(2) 0.0212(19) 0.038(2) -0.0059(17) -0.0104(19) -0.0057(18) 
C42 0.053(4) 0.029(2) 0.044(3) -0.009(2) -0.003(2) -0.016(2) 
C43 0.059(4) 0.025(2) 0.069(4) -0.007(2) -0.011(3) -0.016(3) 
C44 0.041(3) 0.029(2) 0.071(4) -0.027(3) -0.017(3) 0.001(2) 
C45 0.064(4) 0.043(3) 0.048(3) -0.018(3) -0.022(3) -0.004(3) 
C46 0.053(4) 0.031(2) 0.034(2) -0.0067(19) -0.013(2) -0.010(2) 
C51 0.033(3) 0.022(2) 0.0289(19) 0.0020(16) -0.0088(19) -0.0112(19) 
C52 0.034(3) 0.025(2) 0.038(2) 0.0056(18) -0.011(2) -0.016(2) 
C53 0.045(3) 0.028(2) 0.049(3) 0.009(2) -0.012(2) -0.024(2) 
C54 0.048(3) 0.024(2) 0.044(3) 0.010(2) -0.015(2) -0.017(2) 
C55 0.041(3) 0.024(2) 0.043(2) 0.0060(19) -0.019(2) -0.011(2) 
C56 0.032(3) 0.023(2) 0.038(2) 0.0008(17) -0.011(2) -0.0119(19) 
C61 0.020(2) 0.027(2) 0.033(2) -0.0026(17) -0.0052(18) -0.0068(18) 
C62 0.029(3) 0.028(2) 0.048(3) -0.0043(19) -0.007(2) -0.011(2) 
C63 0.028(3) 0.022(2) 0.066(4) -0.006(2) -0.009(3) -0.001(2) 
C64 0.023(3) 0.039(3) 0.061(3) -0.004(2) -0.010(2) -0.007(2) 
C65 0.028(3) 0.046(3) 0.059(3) -0.008(3) -0.015(3) -0.014(2) 
C66 0.026(2) 0.032(2) 0.043(2) -0.0055(19) -0.008(2) -0.014(2) 
C71 0.026(2) 0.023(2) 0.039(2) -0.0042(17) -0.0005(19) -0.0110(18) 
C72 0.052(4) 0.051(3) 0.045(3) -0.003(2) 0.000(3) -0.036(3) 
C73 0.057(4) 0.056(4) 0.056(3) -0.010(3) 0.018(3) -0.039(4) 
C74 0.034(3) 0.042(3) 0.090(5) -0.009(3) 0.012(3) -0.022(3) 
C75 0.034(3) 0.042(3) 0.093(5) -0.006(3) -0.012(3) -0.023(3) 
C76 0.037(3) 0.035(3) 0.058(3) -0.003(2) -0.010(3) -0.020(2) 
C81 0.081(6) 0.064(5) 0.076(5) -0.007(4) -0.007(4) -0.045(5) 
C82 0.082(6) 0.086(5) 0.050(3) -0.002(4) -0.012(4) -0.057(5) 
C83 0.079(6) 0.064(5) 0.062(4) 0.002(4) -0.021(4) -0.033(4) 
C84 0.092(7) 0.077(5) 0.057(4) -0.016(4) -0.005(4) -0.048(5) 
C85 0.108(7) 0.083(6) 0.048(3) -0.001(4) -0.019(4) -0.056(6) 
C86 0.094(7) 0.067(5) 0.067(5) 0.016(4) -0.016(5) -0.047(5) 
C91 0.074(7) 0.078(7) 0.137(10) -0.016(7) -0.035(7) -0.027(6) 
C92 0.062(6) 0.082(7) 0.110(8) -0.016(6) -0.001(6) -0.024(5) 
C93 0.091(8) 0.058(5) 0.083(6) -0.004(4) -0.008(6) -0.025(5) 
C94 0.073(7) 0.071(6) 0.108(8) 0.029(6) -0.013(6) -0.024(5) 
C95 0.062(6) 0.098(8) 0.068(5) 0.014(5) -0.001(5) 0.004(6) 
C96 0.092(8) 0.077(6) 0.084(6) -0.007(5) -0.040(6) -0.003(6) 
 
_geom_special_details 
; 
 All esds (except the esd in the dihedral angle between two l.s. planes) 
 are estimated using the full covariance matrix.  The cell esds are taken 
 into account individually in the estimation of esds in distances, angles 
 and torsion angles; correlations between esds in cell parameters are only 
 used when they are defined by crystal symmetry.  An approximate (isotropic) 
 treatment of cell esds is used for estimating esds involving l.s. planes. 
; 
 
loop_ 
 _geom_bond_atom_site_label_1 
 _geom_bond_atom_site_label_2 
 _geom_bond_distance 
 _geom_bond_site_symmetry_2 
 _geom_bond_publ_flag 
Ta1 N3 1.790(3) . ? 
Ta1 N2 2.132(3) . ? 
Ta1 N1 2.166(4) . ? 
Ta1 O1 2.2079(4) . ? 
Ta1 Ta3 3.1243(7) . ? 
Ta1 Ta2 3.1286(6) . ? 
Ta2 N4 1.793(4) . ? 
Ta2 N6 2.152(3) . ? 
Ta2 N5 2.156(3) . ? 
Ta2 N1 2.199(3) . ? 
Ta2 O1 2.2035(5) . ? 
Ta2 N2 2.225(4) . ? 
Ta2 Ta3 3.1295(7) . ? 
Ta3 N7 1.791(4) . ? 
Ta3 N1 2.188(3) . ? 
Ta3 N6 2.209(3) . ? 
Ta3 O1 2.2119(4) . ? 
N1 C11 1.444(6) . ? 
N2 C21 1.455(5) . ? 
N3 C31 1.394(5) . ? 
N4 C41 1.382(6) . ? 
N5 C51 1.460(5) . ? 
N6 C61 1.438(6) . ? 
N7 C71 1.397(6) . ? 
C11 C16 1.382(8) . ? 
C11 C12 1.385(6) . ? 
C12 C13 1.388(8) . ? 
C13 C14 1.369(10) . ? 
C14 C15 1.368(10) . ? 
C15 C16 1.388(8) . ? 
C21 C26 1.387(6) . ? 
C21 C22 1.404(6) . ? 
C22 C23 1.393(6) . ? 
C23 C24 1.375(7) . ? 
C24 C25 1.385(7) . ? 
C25 C26 1.389(6) . ? 
C31 C36 1.394(7) . ? 
C31 C32 1.396(9) . ? 
C32 C33 1.396(7) . ? 
C33 C34 1.366(10) . ? 
C34 C35 1.356(11) . ? 
C35 C36 1.392(7) . ? 
C41 C46 1.386(7) . ? 
C41 C42 1.397(7) . ? 
C42 C43 1.394(8) . ? 
C43 C44 1.363(10) . ? 
C44 C45 1.376(10) . ? 
C45 C46 1.371(8) . ? 
C51 C56 1.383(6) . ? 
C51 C52 1.387(6) . ? 
C52 C53 1.410(6) . ? 
C53 C54 1.378(8) . ? 
C54 C55 1.382(7) . ? 
C55 C56 1.400(6) . ? 
C61 C62 1.381(7) . ? 
C61 C66 1.404(6) . ? 
C62 C63 1.404(7) . ? 
C63 C64 1.383(8) . ? 
C64 C65 1.382(8) . ? 
C65 C66 1.388(7) . ? 
C71 C72 1.384(7) . ? 
C71 C76 1.404(7) . ? 
C72 C73 1.389(8) . ? 
C73 C74 1.371(11) . ? 
C74 C75 1.366(11) . ? 
C75 C76 1.390(8) . ? 
C81 C86 1.354(12) . ? 
C81 C82 1.404(12) . ? 
C82 C83 1.348(11) . ? 
C83 C84 1.405(11) . ? 
C84 C85 1.351(12) . ? 
C85 C86 1.362(13) . ? 
C91 C96 1.323(16) . ? 
C91 C92 1.378(15) . ? 
C92 C93 1.373(15) . ? 
C93 C94 1.348(15) . ? 
C94 C95 1.381(17) . ? 
C95 C96 1.364(17) . ? 
 
loop_ 
 _geom_angle_atom_site_label_1 
 _geom_angle_atom_site_label_2 
 _geom_angle_atom_site_label_3 
 _geom_angle 
 _geom_angle_site_symmetry_1 
 _geom_angle_site_symmetry_3 
 _geom_angle_publ_flag 
N3 Ta1 N2 112.90(14) . . ? 
N3 Ta1 N1 113.96(16) . . ? 
N2 Ta1 N1 83.90(14) . . ? 
N3 Ta1 O1 174.93(13) . . ? 
N2 Ta1 O1 70.48(8) . . ? 
N1 Ta1 O1 69.70(8) . . ? 
N3 Ta1 Ta3 134.87(12) . . ? 
N2 Ta1 Ta3 103.96(9) . . ? 
N3 Ta1 Ta2 140.29(13) . . ? 
Ta3 Ta1 Ta2 60.065(13) . . ? 
N4 Ta2 N6 111.19(15) . . ? 
N4 Ta2 N5 108.13(15) . . ? 
N6 Ta2 N5 85.22(13) . . ? 
N4 Ta2 N1 112.39(15) . . ? 
N6 Ta2 N1 83.26(12) . . ? 
N5 Ta2 N1 139.36(14) . . ? 
N4 Ta2 O1 177.51(12) . . ? 
N6 Ta2 O1 70.71(10) . . ? 
N5 Ta2 O1 70.21(9) . . ? 
N1 Ta2 O1 69.19(10) . . ? 
N4 Ta2 N2 109.24(15) . . ? 
N6 Ta2 N2 139.56(14) . . ? 
N5 Ta2 N2 83.02(12) . . ? 
N1 Ta2 N2 81.01(13) . . ? 
O1 Ta2 N2 68.89(9) . . ? 
N4 Ta2 Ta1 134.85(10) . . ? 
N6 Ta2 Ta1 103.50(10) . . ? 
N5 Ta2 Ta1 102.60(10) . . ? 
N4 Ta2 Ta3 137.50(12) . . ? 
N5 Ta2 Ta3 104.02(9) . . ? 
N2 Ta2 Ta3 101.51(9) . . ? 
Ta1 Ta2 Ta3 59.900(17) . . ? 
N7 Ta3 N1 112.51(15) . . ? 
N7 Ta3 N6 109.84(15) . . ? 
N1 Ta3 N6 82.23(13) . . ? 
N7 Ta3 O1 178.14(11) . . ? 
N1 Ta3 O1 69.24(10) . . ? 
N6 Ta3 O1 69.54(10) . . ? 
N7 Ta3 Ta1 136.72(11) . . ? 
N6 Ta3 Ta1 102.23(9) . . ? 
N7 Ta3 Ta2 135.99(13) . . ? 
Ta1 Ta3 Ta2 60.034(9) . . ? 
C11 N1 Ta1 128.0(3) . . ? 
C11 N1 Ta3 128.8(3) . . ? 
Ta1 N1 Ta3 91.71(15) . . ? 
C11 N1 Ta2 115.1(3) . . ? 
Ta1 N1 Ta2 91.55(14) . . ? 
Ta3 N1 Ta2 91.02(12) . . ? 
C21 N2 Ta1 129.9(3) . . ? 
C21 N2 Ta2 121.0(3) . . ? 
Ta1 N2 Ta2 91.76(13) . . ? 
C31 N3 Ta1 172.1(4) . . ? 
C41 N4 Ta2 176.2(4) . . ? 
C51 N5 Ta2 121.1(3) . . ? 
C61 N6 Ta2 130.7(3) . . ? 
C61 N6 Ta3 124.3(3) . . ? 
Ta2 N6 Ta3 91.70(12) . . ? 
C71 N7 Ta3 178.3(3) . . ? 
Ta2 O1 Ta1 90.339(14) . . ? 
Ta2 O1 Ta3 90.271(15) . . ? 
Ta1 O1 Ta3 89.964(16) . . ? 
C16 C11 C12 119.8(5) . . ? 
C16 C11 N1 120.5(4) . . ? 
C12 C11 N1 119.7(5) . . ? 
C11 C12 C13 119.7(5) . . ? 
C14 C13 C12 120.5(5) . . ? 
C15 C14 C13 119.8(6) . . ? 
C14 C15 C16 120.8(6) . . ? 
C11 C16 C15 119.4(5) . . ? 
C26 C21 C22 119.4(4) . . ? 
C26 C21 N2 120.5(4) . . ? 
C22 C21 N2 120.1(4) . . ? 
C23 C22 C21 119.3(4) . . ? 
C24 C23 C22 121.4(4) . . ? 
C23 C24 C25 118.8(4) . . ? 
C24 C25 C26 121.2(5) . . ? 
C21 C26 C25 119.9(4) . . ? 
N3 C31 C36 120.9(5) . . ? 
N3 C31 C32 119.6(4) . . ? 
C36 C31 C32 119.4(4) . . ? 
C33 C32 C31 119.6(6) . . ? 
C34 C33 C32 120.5(7) . . ? 
C35 C34 C33 119.7(5) . . ? 
C34 C35 C36 122.1(6) . . ? 
C35 C36 C31 118.6(6) . . ? 
N4 C41 C46 120.9(4) . . ? 
N4 C41 C42 119.8(5) . . ? 
C46 C41 C42 119.2(5) . . ? 
C43 C42 C41 119.4(5) . . ? 
C44 C43 C42 120.8(5) . . ? 
C43 C44 C45 119.3(5) . . ? 
C46 C45 C44 121.4(6) . . ? 
C45 C46 C41 119.9(5) . . ? 
C56 C51 C52 120.7(4) . . ? 
C56 C51 N5 119.4(4) . . ? 
C52 C51 N5 119.9(4) . . ? 
C51 C52 C53 119.0(4) . . ? 
C54 C53 C52 120.5(4) . . ? 
C53 C54 C55 119.7(4) . . ? 
C54 C55 C56 120.5(5) . . ? 
C51 C56 C55 119.5(4) . . ? 
C62 C61 C66 119.6(5) . . ? 
C62 C61 N6 121.3(4) . . ? 
C66 C61 N6 119.1(5) . . ? 
C61 C62 C63 120.0(5) . . ? 
C64 C63 C62 120.7(5) . . ? 
C65 C64 C63 118.7(5) . . ? 
C64 C65 C66 121.7(5) . . ? 
C65 C66 C61 119.3(5) . . ? 
C72 C71 N7 121.6(4) . . ? 
C72 C71 C76 119.1(5) . . ? 
N7 C71 C76 119.3(4) . . ? 
C71 C72 C73 120.5(6) . . ? 
C74 C73 C72 120.0(6) . . ? 
C75 C74 C73 120.4(6) . . ? 
C74 C75 C76 120.8(6) . . ? 
C75 C76 C71 119.2(6) . . ? 
C86 C81 C82 119.0(9) . . ? 
C83 C82 C81 120.5(7) . . ? 
C82 C83 C84 118.9(7) . . ? 
C85 C84 C83 120.3(8) . . ? 
C84 C85 C86 120.2(7) . . ? 
C81 C86 C85 121.0(8) . . ? 
C96 C91 C92 122.6(12) . . ? 
C93 C92 C91 119.6(11) . . ? 
C94 C93 C92 120.1(11) . . ? 
C93 C94 C95 116.9(11) . . ? 
C96 C95 C94 124.8(11) . . ? 
C91 C96 C95 115.9(11) . . ? 
 
loop_ 
 _geom_torsion_atom_site_label_1 
 _geom_torsion_atom_site_label_2 
 _geom_torsion_atom_site_label_3 
 _geom_torsion_atom_site_label_4 
 _geom_torsion 
 _geom_torsion_site_symmetry_1 
 _geom_torsion_site_symmetry_2 
 _geom_torsion_site_symmetry_3 
 _geom_torsion_site_symmetry_4 
 _geom_torsion_publ_flag 
N3 Ta1 Ta2 N4 3.2(3) . . . . ? 
N2 Ta1 Ta2 N4 -67.2(2) . . . . ? 
N1 Ta1 Ta2 N4 74.9(2) . . . . ? 
O1 Ta1 Ta2 N4 -176.50(17) . . . . ? 
Ta3 Ta1 Ta2 N4 128.72(17) . . . . ? 
N3 Ta1 Ta2 N6 -136.5(2) . . . . ? 
N2 Ta1 Ta2 N6 153.01(17) . . . . ? 
N1 Ta1 Ta2 N6 -64.87(16) . . . . ? 
O1 Ta1 Ta2 N6 43.76(10) . . . . ? 
Ta3 Ta1 Ta2 N6 -11.02(10) . . . . ? 
N3 Ta1 Ta2 N5 135.4(2) . . . . ? 
N2 Ta1 Ta2 N5 64.98(16) . . . . ? 
N1 Ta1 Ta2 N5 -152.91(15) . . . . ? 
O1 Ta1 Ta2 N5 -44.28(9) . . . . ? 
Ta3 Ta1 Ta2 N5 -99.06(9) . . . . ? 
N3 Ta1 Ta2 N1 -71.7(2) . . . . ? 
N2 Ta1 Ta2 N1 -142.11(18) . . . . ? 
O1 Ta1 Ta2 N1 108.63(13) . . . . ? 
Ta3 Ta1 Ta2 N1 53.85(13) . . . . ? 
N3 Ta1 Ta2 O1 179.70(19) . . . . ? 
N2 Ta1 Ta2 O1 109.25(13) . . . . ? 
N1 Ta1 Ta2 O1 -108.63(13) . . . . ? 
Ta3 Ta1 Ta2 O1 -54.780(7) . . . . ? 
N3 Ta1 Ta2 N2 70.4(2) . . . . ? 
N1 Ta1 Ta2 N2 142.11(18) . . . . ? 
O1 Ta1 Ta2 N2 -109.25(13) . . . . ? 
Ta3 Ta1 Ta2 N2 -164.03(13) . . . . ? 
N3 Ta1 Ta2 Ta3 -125.52(19) . . . . ? 
N2 Ta1 Ta2 Ta3 164.03(13) . . . . ? 
N1 Ta1 Ta2 Ta3 -53.85(13) . . . . ? 
O1 Ta1 Ta2 Ta3 54.780(7) . . . . ? 
N3 Ta1 Ta3 N7 6.0(3) . . . . ? 
N2 Ta1 Ta3 N7 -138.4(2) . . . . ? 
N1 Ta1 Ta3 N7 -72.6(2) . . . . ? 
O1 Ta1 Ta3 N7 178.86(19) . . . . ? 
Ta2 Ta1 Ta3 N7 -126.78(19) . . . . ? 
N3 Ta1 Ta3 N1 78.6(2) . . . . ? 
N2 Ta1 Ta3 N1 -65.79(16) . . . . ? 
O1 Ta1 Ta3 N1 -108.53(12) . . . . ? 
Ta2 Ta1 Ta3 N1 -54.16(12) . . . . ? 
N3 Ta1 Ta3 N6 143.5(2) . . . . ? 
N2 Ta1 Ta3 N6 -0.94(14) . . . . ? 
N1 Ta1 Ta3 N6 64.85(16) . . . . ? 
O1 Ta1 Ta3 N6 -43.68(10) . . . . ? 
Ta2 Ta1 Ta3 N6 10.68(10) . . . . ? 
N3 Ta1 Ta3 O1 -172.84(18) . . . . ? 
N2 Ta1 Ta3 O1 42.74(10) . . . . ? 
N1 Ta1 Ta3 O1 108.53(12) . . . . ? 
Ta2 Ta1 Ta3 O1 54.362(10) . . . . ? 
N3 Ta1 Ta3 Ta2 132.80(18) . . . . ? 
N2 Ta1 Ta3 Ta2 -11.62(10) . . . . ? 
N1 Ta1 Ta3 Ta2 54.16(12) . . . . ? 
O1 Ta1 Ta3 Ta2 -54.362(9) . . . . ? 
N4 Ta2 Ta3 N7 2.7(2) . . . . ? 
N6 Ta2 Ta3 N7 -67.5(2) . . . . ? 
N5 Ta2 Ta3 N7 -135.61(18) . . . . ? 
N1 Ta2 Ta3 N7 74.7(2) . . . . ? 
O1 Ta2 Ta3 N7 -177.56(15) . . . . ? 
N2 Ta2 Ta3 N7 138.81(18) . . . . ? 
Ta1 Ta2 Ta3 N7 127.79(15) . . . . ? 
N4 Ta2 Ta3 N1 -71.9(2) . . . . ? 
N6 Ta2 Ta3 N1 -142.2(2) . . . . ? 
N5 Ta2 Ta3 N1 149.71(18) . . . . ? 
O1 Ta2 Ta3 N1 107.76(15) . . . . ? 
N2 Ta2 Ta3 N1 64.13(17) . . . . ? 
Ta1 Ta2 Ta3 N1 53.11(15) . . . . ? 
N4 Ta2 Ta3 N6 70.2(2) . . . . ? 
N5 Ta2 Ta3 N6 -68.12(17) . . . . ? 
N1 Ta2 Ta3 N6 142.2(2) . . . . ? 
O1 Ta2 Ta3 N6 -110.06(15) . . . . ? 
N2 Ta2 Ta3 N6 -153.70(17) . . . . ? 
Ta1 Ta2 Ta3 N6 -164.72(15) . . . . ? 
N4 Ta2 Ta3 O1 -179.70(15) . . . . ? 
N6 Ta2 Ta3 O1 110.06(15) . . . . ? 
N5 Ta2 Ta3 O1 41.95(10) . . . . ? 
N1 Ta2 Ta3 O1 -107.76(15) . . . . ? 
N2 Ta2 Ta3 O1 -43.63(9) . . . . ? 
Ta1 Ta2 Ta3 O1 -54.658(14) . . . . ? 
N4 Ta2 Ta3 Ta1 -125.04(15) . . . . ? 
N6 Ta2 Ta3 Ta1 164.72(15) . . . . ? 
N5 Ta2 Ta3 Ta1 96.60(10) . . . . ? 
N1 Ta2 Ta3 Ta1 -53.11(15) . . . . ? 
O1 Ta2 Ta3 Ta1 54.658(14) . . . . ? 
N2 Ta2 Ta3 Ta1 11.02(9) . . . . ? 
N3 Ta1 N1 C11 14.4(4) . . . . ? 
N2 Ta1 N1 C11 -98.0(3) . . . . ? 
O1 Ta1 N1 C11 -169.4(4) . . . . ? 
Ta3 Ta1 N1 C11 144.9(4) . . . . ? 
Ta2 Ta1 N1 C11 -124.0(4) . . . . ? 
N3 Ta1 N1 Ta3 -130.51(14) . . . . ? 
N2 Ta1 N1 Ta3 117.11(12) . . . . ? 
O1 Ta1 N1 Ta3 45.71(7) . . . . ? 
Ta2 Ta1 N1 Ta3 91.07(12) . . . . ? 
N3 Ta1 N1 Ta2 138.42(14) . . . . ? 
N2 Ta1 N1 Ta2 26.04(12) . . . . ? 
O1 Ta1 N1 Ta2 -45.37(7) . . . . ? 
Ta3 Ta1 N1 Ta2 -91.07(12) . . . . ? 
N7 Ta3 N1 C11 -9.5(4) . . . . ? 
N6 Ta3 N1 C11 98.8(4) . . . . ? 
O1 Ta3 N1 C11 169.8(4) . . . . ? 
Ta1 Ta3 N1 C11 -144.5(4) . . . . ? 
Ta2 Ta3 N1 C11 124.0(4) . . . . ? 
N7 Ta3 N1 Ta1 134.91(15) . . . . ? 
N6 Ta3 N1 Ta1 -116.77(14) . . . . ? 
O1 Ta3 N1 Ta1 -45.77(7) . . . . ? 
Ta2 Ta3 N1 Ta1 -91.58(14) . . . . ? 
N7 Ta3 N1 Ta2 -133.50(15) . . . . ? 
N6 Ta3 N1 Ta2 -25.19(14) . . . . ? 
O1 Ta3 N1 Ta2 45.81(8) . . . . ? 
Ta1 Ta3 N1 Ta2 91.58(14) . . . . ? 
N4 Ta2 N1 C11 1.6(3) . . . . ? 
N6 Ta2 N1 C11 -108.6(3) . . . . ? 
N5 Ta2 N1 C11 176.9(3) . . . . ? 
O1 Ta2 N1 C11 179.5(3) . . . . ? 
N2 Ta2 N1 C11 108.8(3) . . . . ? 
Ta1 Ta2 N1 C11 133.8(3) . . . . ? 
Ta3 Ta2 N1 C11 -134.4(4) . . . . ? 
N4 Ta2 N1 Ta1 -132.26(15) . . . . ? 
N6 Ta2 N1 Ta1 117.56(15) . . . . ? 
N5 Ta2 N1 Ta1 43.0(2) . . . . ? 
O1 Ta2 N1 Ta1 45.67(8) . . . . ? 
N2 Ta2 N1 Ta1 -25.06(12) . . . . ? 
Ta3 Ta2 N1 Ta1 91.73(15) . . . . ? 
N4 Ta2 N1 Ta3 136.01(15) . . . . ? 
N6 Ta2 N1 Ta3 25.83(15) . . . . ? 
N5 Ta2 N1 Ta3 -48.7(2) . . . . ? 
O1 Ta2 N1 Ta3 -46.06(9) . . . . ? 
N2 Ta2 N1 Ta3 -116.79(15) . . . . ? 
Ta1 Ta2 N1 Ta3 -91.73(15) . . . . ? 
N3 Ta1 N2 C21 -5.0(5) . . . . ? 
N1 Ta1 N2 C21 108.5(4) . . . . ? 
O1 Ta1 N2 C21 179.1(4) . . . . ? 
Ta3 Ta1 N2 C21 148.4(4) . . . . ? 
Ta2 Ta1 N2 C21 134.2(5) . . . . ? 
N3 Ta1 N2 Ta2 -139.19(16) . . . . ? 
N1 Ta1 N2 Ta2 -25.72(12) . . . . ? 
O1 Ta1 N2 Ta2 44.87(7) . . . . ? 
Ta3 Ta1 N2 Ta2 14.22(12) . . . . ? 
N4 Ta2 N2 C21 -3.9(3) . . . . ? 
N6 Ta2 N2 C21 177.0(3) . . . . ? 
N5 Ta2 N2 C21 102.9(3) . . . . ? 
N1 Ta2 N2 C21 -114.6(3) . . . . ? 
O1 Ta2 N2 C21 174.3(3) . . . . ? 
Ta1 Ta2 N2 C21 -140.1(4) . . . . ? 
Ta3 Ta2 N2 C21 -154.2(3) . . . . ? 
N4 Ta2 N2 Ta1 136.18(14) . . . . ? 
N6 Ta2 N2 Ta1 -42.9(2) . . . . ? 
N5 Ta2 N2 Ta1 -117.01(14) . . . . ? 
N1 Ta2 N2 Ta1 25.49(13) . . . . ? 
O1 Ta2 N2 Ta1 -45.57(8) . . . . ? 
Ta3 Ta2 N2 Ta1 -14.05(11) . . . . ? 
N4 Ta2 N5 C51 -7.7(3) . . . . ? 
N6 Ta2 N5 C51 103.1(3) . . . . ? 
N1 Ta2 N5 C51 176.9(3) . . . . ? 
O1 Ta2 N5 C51 174.3(3) . . . . ? 
N2 Ta2 N5 C51 -115.7(3) . . . . ? 
Ta1 Ta2 N5 C51 -154.2(3) . . . . ? 
Ta3 Ta2 N5 C51 144.1(3) . . . . ? 
N4 Ta2 N6 C61 3.3(4) . . . . ? 
N5 Ta2 N6 C61 -104.3(4) . . . . ? 
N1 Ta2 N6 C61 114.8(4) . . . . ? 
O1 Ta2 N6 C61 -175.0(4) . . . . ? 
N2 Ta2 N6 C61 -177.6(3) . . . . ? 
Ta1 Ta2 N6 C61 153.9(3) . . . . ? 
Ta3 Ta2 N6 C61 140.3(4) . . . . ? 
N4 Ta2 N6 Ta3 -137.01(14) . . . . ? 
N5 Ta2 N6 Ta3 115.39(14) . . . . ? 
N1 Ta2 N6 Ta3 -25.57(14) . . . . ? 
O1 Ta2 N6 Ta3 44.70(9) . . . . ? 
N2 Ta2 N6 Ta3 42.0(2) . . . . ? 
Ta1 Ta2 N6 Ta3 13.56(13) . . . . ? 
N7 Ta3 N6 C61 -7.2(4) . . . . ? 
N1 Ta3 N6 C61 -118.4(4) . . . . ? 
O1 Ta3 N6 C61 170.9(4) . . . . ? 
Ta1 Ta3 N6 C61 -157.7(3) . . . . ? 
Ta2 Ta3 N6 C61 -144.2(4) . . . . ? 
N7 Ta3 N6 Ta2 136.97(15) . . . . ? 
N1 Ta3 N6 Ta2 25.78(14) . . . . ? 
O1 Ta3 N6 Ta2 -44.90(9) . . . . ? 
Ta1 Ta3 N6 Ta2 -13.51(13) . . . . ? 
N6 Ta2 O1 Ta1 -134.56(9) . . . . ? 
N5 Ta2 O1 Ta1 133.60(9) . . . . ? 
N1 Ta2 O1 Ta1 -44.56(10) . . . . ? 
N2 Ta2 O1 Ta1 43.58(9) . . . . ? 
Ta3 Ta2 O1 Ta1 -89.966(17) . . . . ? 
N6 Ta2 O1 Ta3 -44.59(9) . . . . ? 
N5 Ta2 O1 Ta3 -136.43(9) . . . . ? 
N1 Ta2 O1 Ta3 45.40(10) . . . . ? 
N2 Ta2 O1 Ta3 133.55(9) . . . . ? 
Ta1 Ta2 O1 Ta3 89.966(16) . . . . ? 
N2 Ta1 O1 Ta2 -45.40(11) . . . . ? 
N1 Ta1 O1 Ta2 45.23(10) . . . . ? 
Ta3 Ta1 O1 Ta2 90.270(15) . . . . ? 
N2 Ta1 O1 Ta3 -135.67(11) . . . . ? 
N1 Ta1 O1 Ta3 -45.04(10) . . . . ? 
Ta2 Ta1 O1 Ta3 -90.270(15) . . . . ? 
N1 Ta3 O1 Ta2 -45.69(10) . . . . ? 
N6 Ta3 O1 Ta2 43.57(10) . . . . ? 
Ta1 Ta3 O1 Ta2 -90.339(14) . . . . ? 
N1 Ta3 O1 Ta1 44.65(10) . . . . ? 
N6 Ta3 O1 Ta1 133.91(10) . . . . ? 
Ta2 Ta3 O1 Ta1 90.339(15) . . . . ? 
Ta1 N1 C11 C16 -147.5(4) . . . . ? 
Ta3 N1 C11 C16 -15.0(6) . . . . ? 
Ta2 N1 C11 C16 98.7(5) . . . . ? 
Ta1 N1 C11 C12 34.0(6) . . . . ? 
Ta3 N1 C11 C12 166.5(3) . . . . ? 
Ta2 N1 C11 C12 -79.8(5) . . . . ? 
C16 C11 C12 C13 -0.6(8) . . . . ? 
N1 C11 C12 C13 177.9(5) . . . . ? 
C11 C12 C13 C14 1.8(9) . . . . ? 
C12 C13 C14 C15 -1.9(11) . . . . ? 
C13 C14 C15 C16 0.8(12) . . . . ? 
C12 C11 C16 C15 -0.4(9) . . . . ? 
N1 C11 C16 C15 -179.0(6) . . . . ? 
C14 C15 C16 C11 0.4(11) . . . . ? 
Ta1 N2 C21 C26 -165.8(4) . . . . ? 
Ta2 N2 C21 C26 -42.5(6) . . . . ? 
Ta1 N2 C21 C22 14.0(7) . . . . ? 
Ta2 N2 C21 C22 137.3(4) . . . . ? 
C26 C21 C22 C23 0.5(9) . . . . ? 
N2 C21 C22 C23 -179.4(5) . . . . ? 
C21 C22 C23 C24 0.8(10) . . . . ? 
C22 C23 C24 C25 -1.3(10) . . . . ? 
C23 C24 C25 C26 0.4(9) . . . . ? 
C22 C21 C26 C25 -1.3(8) . . . . ? 
N2 C21 C26 C25 178.5(5) . . . . ? 
C24 C25 C26 C21 0.9(9) . . . . ? 
N3 C31 C32 C33 -177.9(5) . . . . ? 
C36 C31 C32 C33 -1.1(8) . . . . ? 
C31 C32 C33 C34 0.4(10) . . . . ? 
C32 C33 C34 C35 1.3(10) . . . . ? 
C33 C34 C35 C36 -2.3(11) . . . . ? 
C34 C35 C36 C31 1.6(10) . . . . ? 
N3 C31 C36 C35 176.9(5) . . . . ? 
C32 C31 C36 C35 0.1(8) . . . . ? 
N4 C41 C42 C43 -177.7(5) . . . . ? 
C46 C41 C42 C43 -0.5(9) . . . . ? 
C41 C42 C43 C44 1.8(10) . . . . ? 
C42 C43 C44 C45 -2.6(10) . . . . ? 
C43 C44 C45 C46 2.0(10) . . . . ? 
C44 C45 C46 C41 -0.7(10) . . . . ? 
N4 C41 C46 C45 177.1(5) . . . . ? 
C42 C41 C46 C45 -0.1(9) . . . . ? 
Ta2 N5 C51 C56 -75.7(5) . . . . ? 
Ta2 N5 C51 C52 106.4(5) . . . . ? 
C56 C51 C52 C53 0.7(8) . . . . ? 
N5 C51 C52 C53 178.6(5) . . . . ? 
C51 C52 C53 C54 -2.6(8) . . . . ? 
C52 C53 C54 C55 3.1(9) . . . . ? 
C53 C54 C55 C56 -1.6(9) . . . . ? 
C52 C51 C56 C55 0.7(7) . . . . ? 
N5 C51 C56 C55 -177.2(5) . . . . ? 
C54 C55 C56 C51 -0.3(8) . . . . ? 
Ta2 N6 C61 C62 12.8(6) . . . . ? 
Ta3 N6 C61 C62 142.3(4) . . . . ? 
Ta2 N6 C61 C66 -167.2(3) . . . . ? 
Ta3 N6 C61 C66 -37.8(6) . . . . ? 
C66 C61 C62 C63 -1.0(8) . . . . ? 
N6 C61 C62 C63 178.9(5) . . . . ? 
C61 C62 C63 C64 0.3(9) . . . . ? 
C62 C63 C64 C65 0.7(10) . . . . ? 
C63 C64 C65 C66 -1.0(9) . . . . ? 
C64 C65 C66 C61 0.3(9) . . . . ? 
C62 C61 C66 C65 0.7(8) . . . . ? 
N6 C61 C66 C65 -179.2(5) . . . . ? 
N7 C71 C72 C73 178.4(6) . . . . ? 
C76 C71 C72 C73 -1.6(9) . . . . ? 
C71 C72 C73 C74 0.9(11) . . . . ? 
C72 C73 C74 C75 0.9(11) . . . . ? 
C73 C74 C75 C76 -1.8(10) . . . . ? 
C74 C75 C76 C71 1.0(9) . . . . ? 
C72 C71 C76 C75 0.7(8) . . . . ? 
N7 C71 C76 C75 -179.3(5) . . . . ? 
C86 C81 C82 C83 0.1(12) . . . . ? 
C81 C82 C83 C84 -1.3(12) . . . . ? 
C82 C83 C84 C85 1.8(14) . . . . ? 
C83 C84 C85 C86 -1.0(15) . . . . ? 
C82 C81 C86 C85 0.8(14) . . . . ? 
C84 C85 C86 C81 -0.3(15) . . . . ? 
C96 C91 C92 C93 -4.1(18) . . . . ? 
C91 C92 C93 C94 4.4(17) . . . . ? 
C92 C93 C94 C95 -1.7(16) . . . . ? 
C93 C94 C95 C96 -1.5(16) . . . . ? 
C92 C91 C96 C95 0.9(16) . . . . ? 
C94 C95 C96 C91 2.0(16) . . . . ? 
 
_diffrn_measured_fraction_theta_max    0.925 
_diffrn_reflns_theta_full              33.67 
_diffrn_measured_fraction_theta_full   0.925 
_refine_diff_density_max    2.820 
_refine_diff_density_min   -2.150 
_refine_diff_density_rms    0.305 
